# Supplementary material for: Doxorubicin-Loaded Metal-Organic Frameworks Nanoparticles with Engineered Cyclodextrin Coatings: Insights on Drug Location by Solid State NMR Spectroscopy
Source: PubMed Central journal article supplement (PMC8068177; doi:10.3390/nano11040945), 2021-04-08
Supplement: nanomaterials-11-00945-s001.pdf [file nanomaterials-11-00945-s001.pdf]

*Supporting information*

# **Doxorubicin-Loaded Metal-Organic Frameworks Nanoparticles with Engineered Cyclodextrin Coatings: Insights on Drug Location by Solid State NMR Spectroscopy**

**Xue Li <sup>1,†</sup>, Marianna Porcino <sup>2,†</sup>, Jingwen Qiu <sup>1</sup>, Doru Constantin <sup>3</sup>, Charlotte Martineau-Corcoc <sup>2,4,\*</sup> and Ruxandra Gref <sup>1,\*</sup>**

<sup>1</sup> Institut des Sciences Moléculaires d'Orsay, UMR CNRS 8214, Paris-Sud University, Université Paris Saclay, 91400 Orsay, France; xue.li@universite-paris-saclay.fr (X.L.); jingwen.qiu@universite-paris-saclay.fr (J.Q.)

<sup>2</sup> CEMHTI UPR CNRS 3079, Université d'Orléans, F-45071 Orléans, France; marianna.porcino@cnrs-orleans.fr

<sup>3</sup> Laboratoire de Physique des Solides, UMR 8502, Université Paris-Sud, 91405 Orsay, France; doru.constantin@universite-paris-saclay.fr

<sup>4</sup> Université Paris Saclay, ILV UMR CNRS 8180, Université de Versailles St-Quentin en Yvelines, 78035 Versailles, France

\* Correspondence: ccorcos@cortecnet.com (C.M.-C.); ruxandra.gref@universite-paris-saclay.fr (R.G.); Tel.: +33-(0)-1-30-12-11-31 (C.M.-C.); +33-(0)-1-69-15-82-34 (R.G.)

† These authors contributed equally.

‡ Current Address: CortecNet, 7 avenue du Hoggar, 91940 Les Ulis, France.

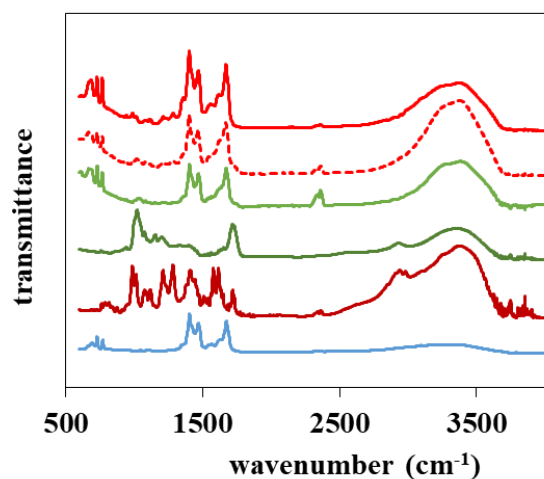

Figure S1. FTIR Characterization of the particles before and after drug loading and/or surface functionalization (blue: empty nanoMOFs; dark green: CD-CO; green: nanoMOFs coated with CD-CO; red: nanoMOFs loaded with DOX at TDL of 50 %; red dashed line: nanoMOFs loaded with DOX at TDL of 50% and coated with CD-CO).

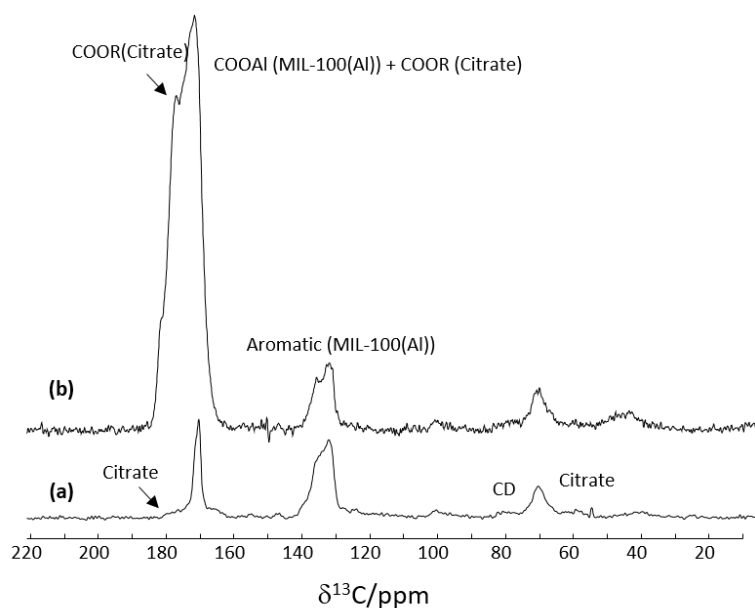

Figure S2.  $^{13}\text{C}$  CPMAS NMR spectra of (a) CD-CO coated nanoMIL-100(Al) and (b)  $^{13}\text{C}$ -CD-CO coated nanoMIL-100(Al)

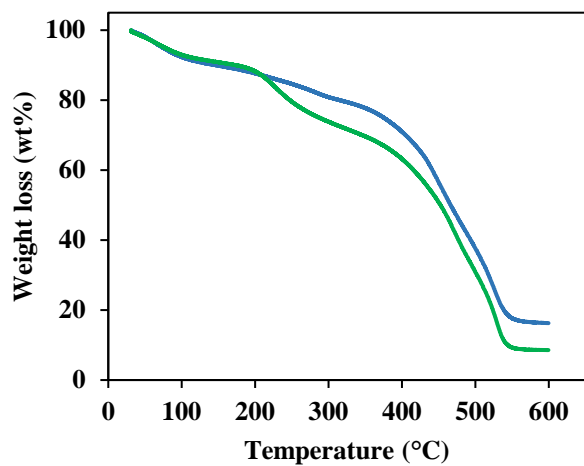

Figure S3. TGA curve of nanoMOFs (blue) and CD-CO coated nanoMOFs (green)

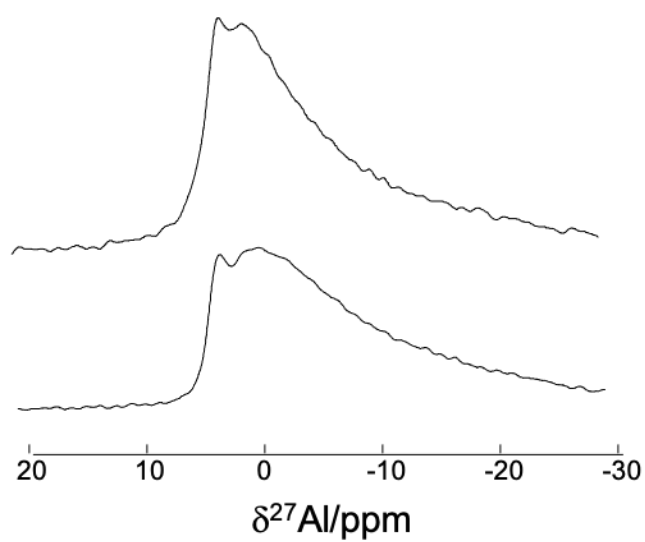

Figure S4.  $^{27}\text{Al}$  MAS NMR spectrum of nanoMIL-100 (bottom) and CD-CO coated nanoMIL-100 (top)

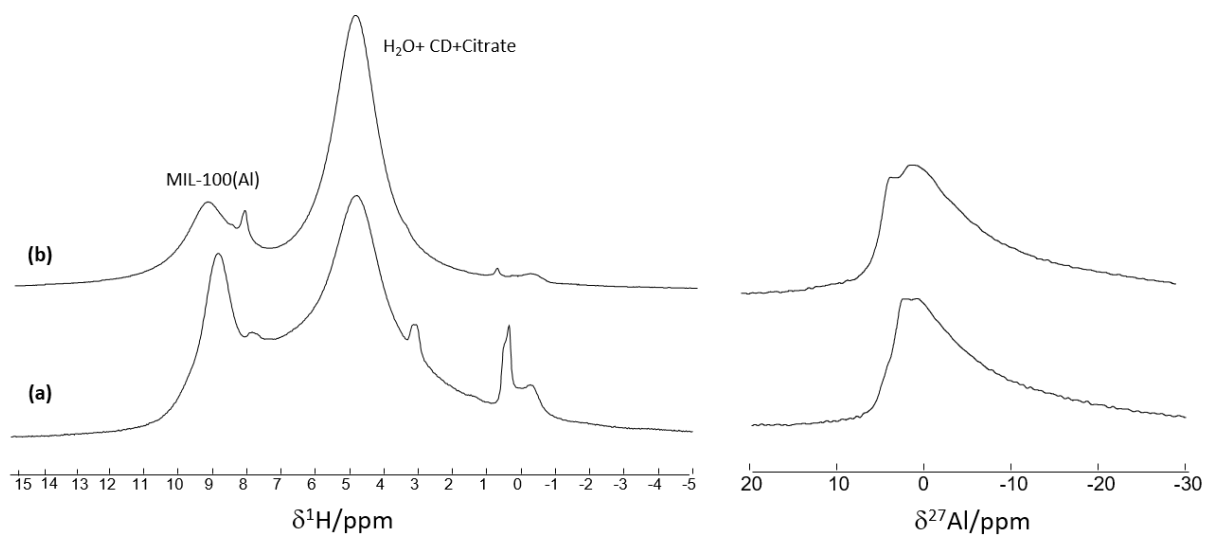

Figure S5.  $^1\text{H}$  (left) and  $^{27}\text{Al}$  (right) MAS NMR spectra of (a) CD-CO coated nanoMIL-100(Al) and (b)  $^{13}\text{C}$ - CD-CO coated nanoMIL-100(Al)

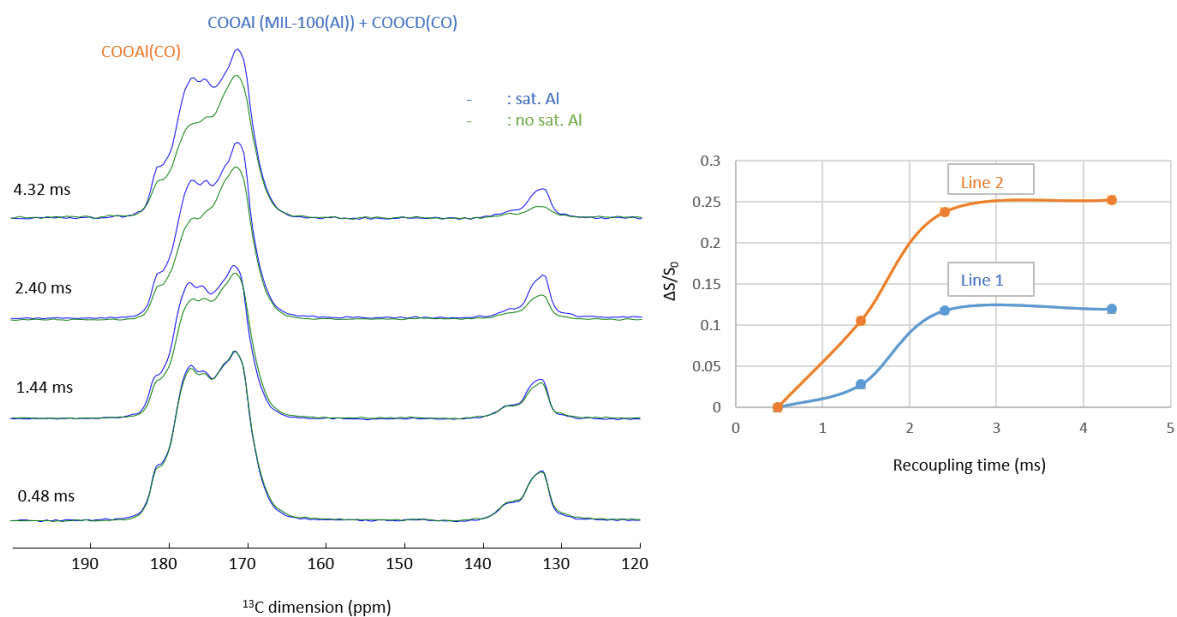

Figure S6. Left:  $^{13}\text{C}$ - $^{27}\text{Al}$  CP-RESPDOR NMR spectra (left) with non (green) and saturation (blue) of Al nuclei, recorded at 12.5 kHz (9.4 T) at different recoupling time. Right: RESPDOR curves of Line 2 (corresponding to COOAl (CO) and shown in orange) and Line 1 (corresponding to COOAl (MIL-100(Al)) + COOCD (CO) and shown blue)
